# Supplementary material for: Pathogenic antibodies induced by spike proteins of COVID-19 and SARS-CoV viruses
Source: Research Square preprint supplement (doi:10.21203/rs.3.rs-612103/v1), 2021-06-11

## Supplemental data

**Figure S1.** Additional representative images of the histological changes of lungs and brains from the newborn mouse pups born to the dames injected with anti-coronavirus spike antibodies. Lung branch and alveolar epithelial hyperplasia and thickening and hemorrhage, as well as infiltration of inflammatory cells of brains are shown.

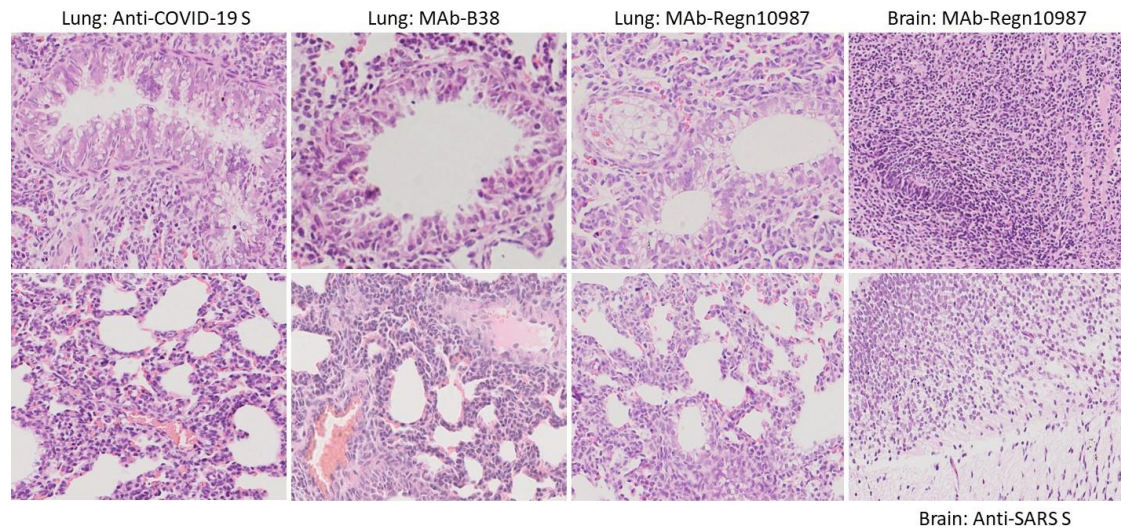

**Figure S2.** Additional representative images of the histological changes of kidneys, brains and hearts from the mouse pups born to the dames injected with anti-coronavirus spike antibodies. Kidney inflammation, brain and heart hemorrhages are shown.

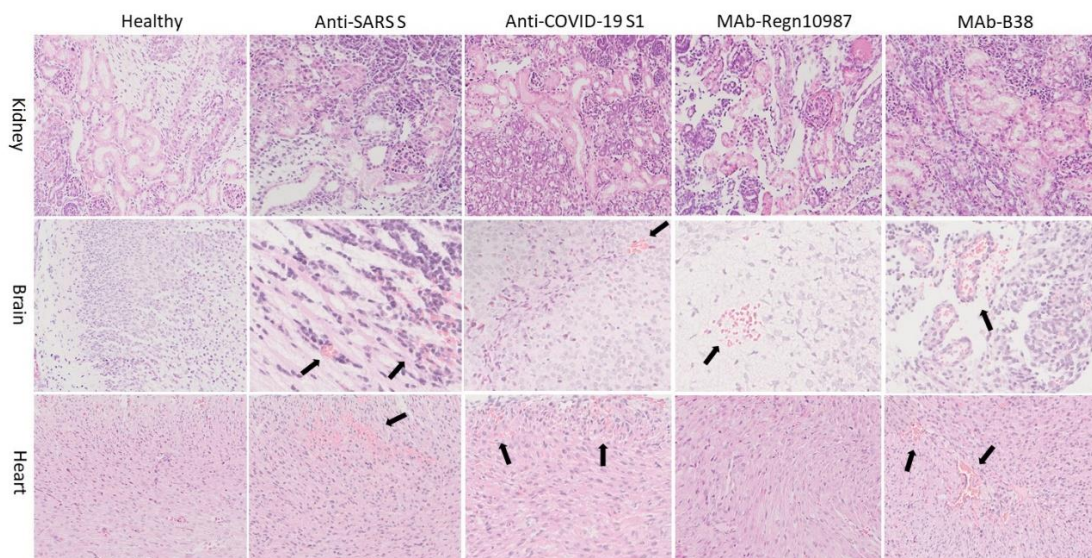

Supplement: Supplementary file 1 [file 6805d19570f49a70f3ef931e.pdf]
